# Supplementary material for: Elucidation of the Inhibitory Effect of Phytochemicals with Kir6.2 Wild-Type and Mutant Models Associated in Type-1 Diabetes through Molecular Docking Approach
Source: PubMed Central journal article supplement — Genomics Inform. 2014 Dec 31;12(4):283–8. doi: 10.5808/GI.2014.12.4.283 (PMC4330267; doi:10.5808/gi.2014.12.4.283), 2014-12-31
Supplement: gni-12-283-s001.pdf [file gni-12-283-s001.pdf]

## SUPPLEMENTARY INFORMATION

### **Elucidation of the Inhibitory Effect of Phytochemicals with Kir6.2 Wild and Mutant Models Associated in Type-1 Diabetes through Molecular Docking Approach**

**Manaswini Jagadeb<sup>1</sup>, V Badireenath Konkimalla<sup>2</sup>,  
Surya Narayan Rath<sup>1\*</sup>, Rohit Pritam Das<sup>1</sup>**

<sup>1</sup>BIF Centre, Department of Bioinformatics, Orissa University of Agriculture and Technology, Bhubaneswar 751003, India, <sup>2</sup>School of Biological Sciences, National Institute of Science Education and Research, Bhubaneswar 751005, India

**Supplementary Table 1.** Comparison of secondary structural elements resulting from Phyre2 server for kir6.2 models

| <b>Kir6.2 model</b> | <b>Alpha helix (%)</b> | <b>Beta strand (%)</b> | <b>Disordered (%)</b> |
|---------------------|------------------------|------------------------|-----------------------|
| Wild-type           | 24                     | 40                     | 18                    |
| Mutant              | 33                     | 30                     | 21                    |
