# Supplementary material for: Elucidation of the Inhibitory Effect of Phytochemicals with Kir6.2 Wild-Type and Mutant Models Associated in Type-1 Diabetes through Molecular Docking Approach
Source: PubMed Central journal article supplement — Genomics Inform. 2014 Dec 31;12(4):283–8. doi: 10.5808/GI.2014.12.4.283 (PMC4330267; doi:10.5808/gi.2014.12.4.283), 2014-12-31
Supplement: gni-12-283-s002.pdf [file gni-12-283-s002.pdf]

**Supplementary Table 2.** Binding energy and inhibition constant of best poses of phytochemicals docked within the binding pocket of wild-type and mutant kir6.2 models

| <b>Phytochemical</b> | <b>Binding energy<br/>in wild-type<br/>(kcal/mol)</b> | <b>Binding energy in<br/>mutant-type<br/>(kcal/mol)</b> | <b>Inhibition<br/>constant in<br/>wild-type<br/>(<math>\mu</math>M)</b> | <b>Inhibition<br/>constant in<br/>mutant (<math>\mu</math>M)</b> |
|----------------------|-------------------------------------------------------|---------------------------------------------------------|-------------------------------------------------------------------------|------------------------------------------------------------------|
| Curcumin             | -7.93                                                 | -7.91                                                   | 1.53                                                                    | 1.59                                                             |
| Genistein            | -7.52                                                 | -7.92                                                   | 3.05                                                                    | 1.57                                                             |
| Piperine             | -6.36                                                 | -6.9                                                    | 21.63                                                                   | 8.72                                                             |
| Pterostilbene        | -7.54                                                 | -7.3                                                    | 2.95                                                                    | 4.47                                                             |
