# Supplementary material for: Elucidation of the Inhibitory Effect of Phytochemicals with Kir6.2 Wild-Type and Mutant Models Associated in Type-1 Diabetes through Molecular Docking Approach
Source: PubMed Central journal article supplement — Genomics Inform. 2014 Dec 31;12(4):283–8. doi: 10.5808/GI.2014.12.4.283 (PMC4330267; doi:10.5808/gi.2014.12.4.283), 2014-12-31
Supplement: gni-12-283-s003.pdf [file gni-12-283-s003.pdf]

**Supplementary Fig. 1.** Phytochemicals extracted from Pubchem database showing anti-diabetic property

| Ligand                                                                                    | Structure | Reference |
|-------------------------------------------------------------------------------------------|-----------|-----------|
| <p>Curcumin<br/>(CID: 969516);<br/>molecular<br/>weight<br/>368.3799 g/mol</p>            |           | [3]       |
| <p>Genistein<br/>(CID: 5280961);<br/>molecular<br/>weight<br/>270.2369 g/mol</p>          |           | [4]       |
| <p>Piperine<br/>(CID: 2763851);<br/>molecular<br/>weight<br/>215.28934<br/>g/mol</p>      |           | [5]       |
| <p>Pterostilbene<br/>(CID: 5281727);<br/>molecular<br/>weight<br/>256.29644<br/>g/mol</p> |           | [6, 16]   |
