# Supplementary material for: Elucidation of the Inhibitory Effect of Phytochemicals with Kir6.2 Wild-Type and Mutant Models Associated in Type-1 Diabetes through Molecular Docking Approach
Source: PubMed Central journal article supplement — Genomics Inform. 2014 Dec 31;12(4):283–8. doi: 10.5808/GI.2014.12.4.283 (PMC4330267; doi:10.5808/gi.2014.12.4.283), 2014-12-31
Supplement: gni-12-283-s005.pdf [file gni-12-283-s005.pdf]

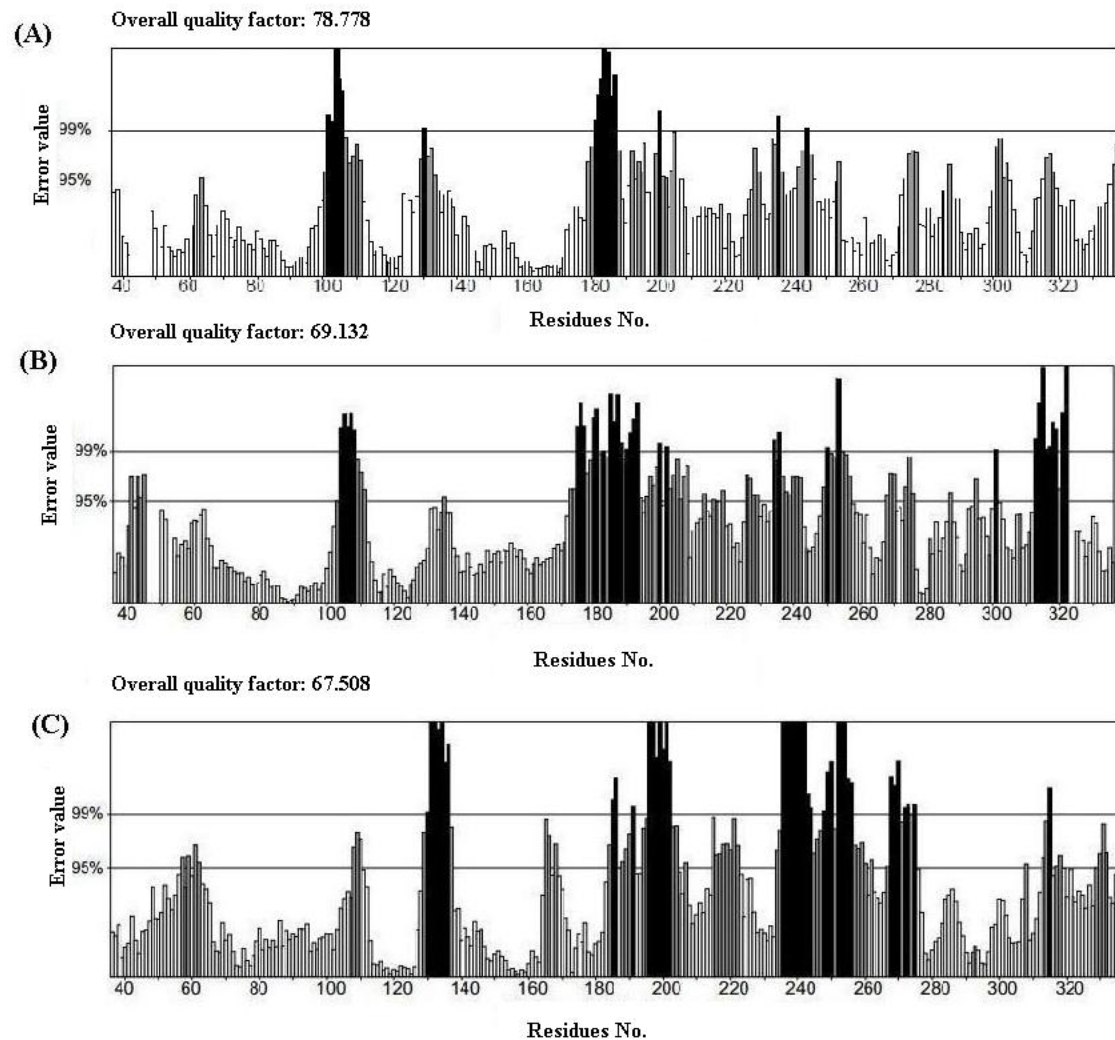

**Supplementary Fig. 3.** The overall quality of non-bonded interactions between atoms of current model of kir6.2 (A), second existing kir6.2 model (B), and third existing kir6.2 model (C) are depicted residue wise along X-axis with respect to error function along Y-axis. Two lines drawn on error axis to indicate the confidence percentage with which it is possible to reject regions that exceed that error value.
