# Supplementary material for: Elucidation of the Inhibitory Effect of Phytochemicals with Kir6.2 Wild-Type and Mutant Models Associated in Type-1 Diabetes through Molecular Docking Approach
Source: PubMed Central journal article supplement — Genomics Inform. 2014 Dec 31;12(4):283–8. doi: 10.5808/GI.2014.12.4.283 (PMC4330267; doi:10.5808/gi.2014.12.4.283), 2014-12-31
Supplement: gni-12-283-s008.pdf [file gni-12-283-s008.pdf]

Z-score: -5.96

(A)

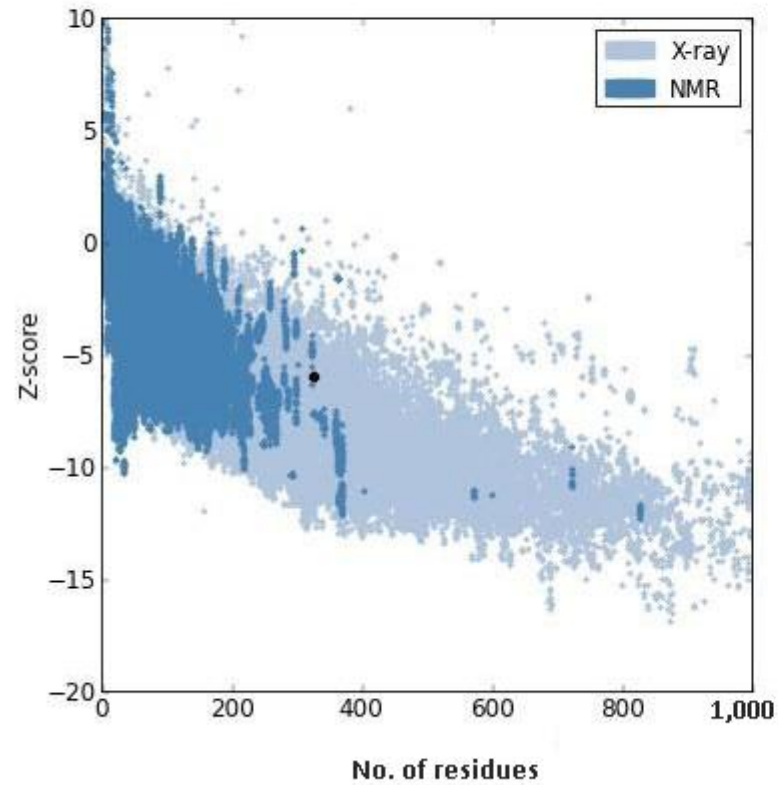

Z-score: -5.67

(B)

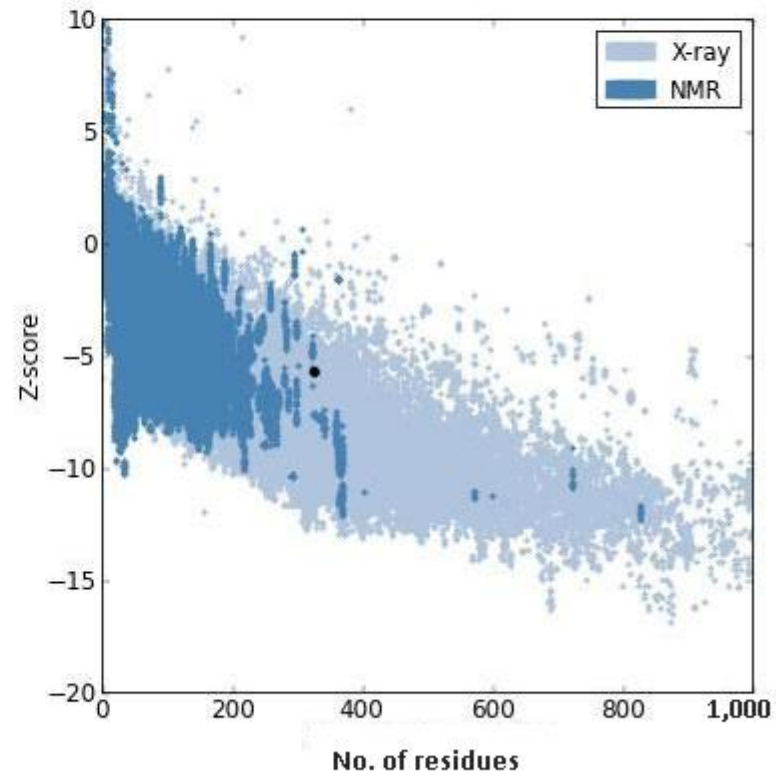

**Supplementary Fig. 6.** The z-score are plotted for wild type kir6.2 (A) and mutant type kir6.2 (B) models indicate overall model quality. The black dot spot in the picture specifies the kir6.2 model is in the range of z-scores of all experimentally determined protein chains in current PDB.
