# Supplementary material for: Elucidation of the Inhibitory Effect of Phytochemicals with Kir6.2 Wild-Type and Mutant Models Associated in Type-1 Diabetes through Molecular Docking Approach
Source: PubMed Central journal article supplement — Genomics Inform. 2014 Dec 31;12(4):283–8. doi: 10.5808/GI.2014.12.4.283 (PMC4330267; doi:10.5808/gi.2014.12.4.283), 2014-12-31
Supplement: gni-12-283-s009.pdf [file gni-12-283-s009.pdf]

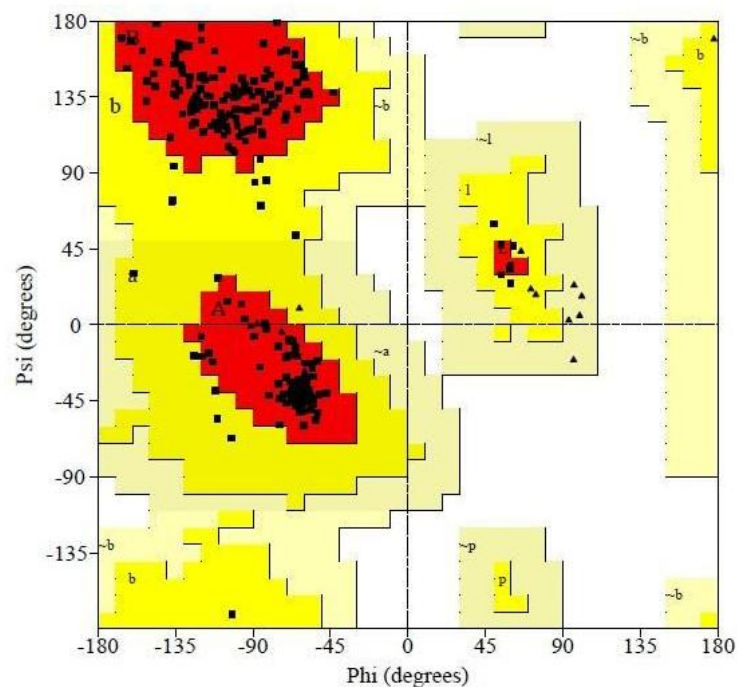

|                                                      |     |        |
|------------------------------------------------------|-----|--------|
| Residues in most favoured regions [A,B,L]            | 273 | 93.8%  |
| Residues in additional allowed regions [a,b,l,p]     | 18  | 6.2%   |
| Residues in generously allowed regions [-a,-b,-l,-p] | 0   | 0.0%   |
| Residues in disallowed regions                       | 0   | 0.0%   |
| -----                                                |     |        |
| Number of non-glycine and non-proline residues       | 291 | 100.0% |
| Number of end-residues (excl. Gly and Pro)           | 2   |        |
| Number of glycine residues (shown as triangles)      | 20  |        |
| Number of proline residues                           | 13  |        |
| -----                                                |     |        |
| Total number of residues                             | 326 |        |

(A) Ramachandran Plot for kir6.2 model (wild type)

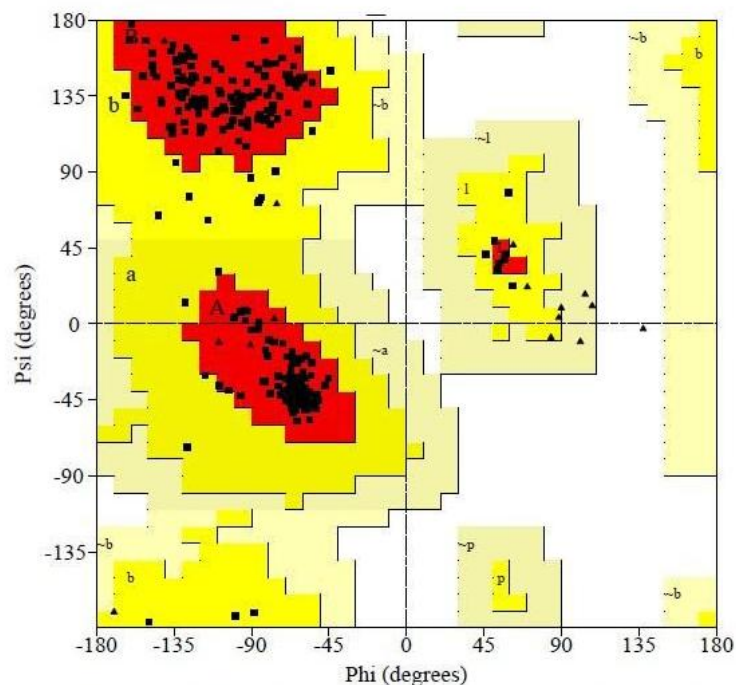

|                                                      |     |        |
|------------------------------------------------------|-----|--------|
| Residues in most favoured regions [A,B,L]            | 270 | 92.8%  |
| Residues in additional allowed regions [a,b,l,p]     | 21  | 7.2%   |
| Residues in generously allowed regions [-a,-b,-l,-p] | 0   | 0.0%   |
| Residues in disallowed regions                       | 0   | 0.0%   |
| -----                                                |     |        |
| Number of non-glycine and non-proline residues       | 291 | 100.0% |
| Number of end-residues (excl. Gly and Pro)           | 2   |        |
| Number of glycine residues (shown as triangles)      | 19  |        |
| Number of proline residues                           | 14  |        |
| -----                                                |     |        |
| Total number of residues                             | 326 |        |

(B) Ramachandran Plot for kir6.2 model (mutant type)

**Supplementary Fig. 7.** The backbone folding patterns plotted for wild type kir6.2 (A) and mutant type kir6.2 (B) models. Each black dot spot corresponds to one amino acid residue of kir6.2 chain. On the plot most favoured regions, additional allowed regions, generously allowed regions and disallowed regions are shown in red, yellow, light yellow and white color respectively.
